# Supplementary material
Source: HighWire-hosted journal article supplement (https://jnnp.bmj.com/content/jnnp-2017-317823)
Supplement: inline-supplementary-material-3 [file inline-supplementary-material-3.pdf]

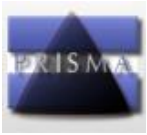

## PRISMA 2009 Flow Diagram: Functional Neurological Disorders

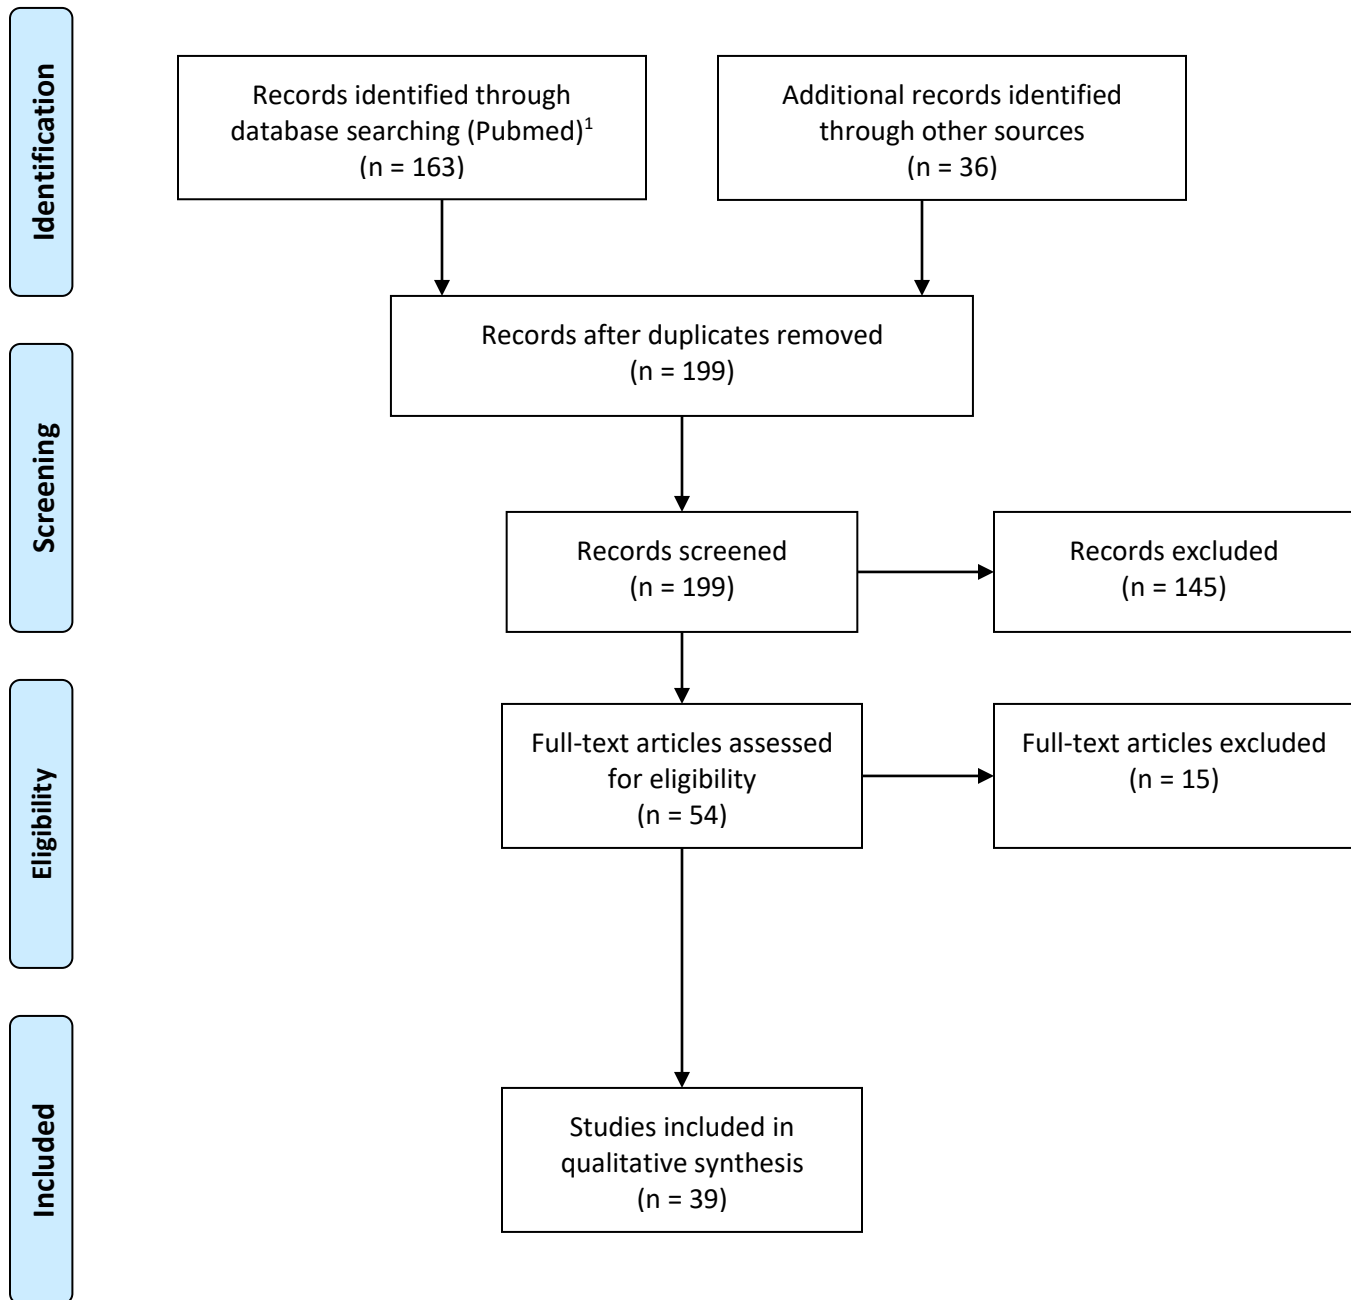

### <sup>(1)</sup> Details of database-search strategy:

- Database: Pubmed
- Search dates:
  - functional movement disorders (FMD): 22/12/2015
  - non-epileptic attacks (NEA): 30/01/2016

- Key words:

- For FMD: (*“psychogenic movement disorders”*[All fields] OR *“functional movement disorders”*[All fields]) AND (*“cognition”*[All fields] OR *“cognitive”*[All fields] OR *“memory”*[All fields] OR *“fog”*[All fields])

- For NEA: (*“non-epileptic”*[All fields] OR *“nonepileptic”*[All fields] OR *“non epileptic”* [All fields] OR *“dissociative seizure”*[All fields] OR *“dissociative seizures”*[All fields] OR *“dissociative attack”*[All fields] OR *“dissociative attacks”*[All fields] OR *“conversion seizure”*[All fields] OR *“conversion seizures”*[All fields] OR *“conversion attack”*[All fields] OR *“conversion attacks”*[All fields] OR *“hysterical seizure”*[All fields] OR *“hysterical attack”*[All fields] OR *“pseudoseizure”*[All fields] OR *“pseudo seizure”*[All fields] OR *“pseudo-seizure”*[All fields]) AND (*“cognition”*[All fields] OR *“cognitive”*[All fields] OR *“memory”*[All fields] OR *“fog”*[All fields])
